# Supplementary material for: Viewing pre-60S maturation at a minute’s timescale
Source: PubMed Central journal article supplement — Nucleic Acids Res. 2017 Dec 27;46(6):3140–51. doi: 10.1093/nar/gkx1293 (PMC5888160; doi:10.1093/nar/gkx1293), 2017-12-27
Supplement: gkx1293_supp.pdf [file gkx1293_supp.pdf]

## Viewing pre-60S maturation at a minute's timescale

### Supplemental information

Gertrude Zisser<sup>1</sup>, Uli Ohmayer<sup>2</sup>, Christina Mauerhofer<sup>3</sup>, Valentin Mitterer<sup>1</sup>, Isabella Klein<sup>1</sup>, Gerald N. Rechberger<sup>1,4</sup>, Heimo Wolinsky<sup>1,5</sup>, Michael Prattes<sup>1</sup>, Brigitte Pertschy<sup>1,5</sup>, Philipp Milkereit<sup>6</sup> and Helmut Bergler<sup>\*1,5</sup>

<sup>1</sup>Institute of Molecular Biosciences, Humboldtstrasse 50, University of Graz, A-8010 Graz, Austria

<sup>2</sup>Polyquant GmbH, Industriestr. 1, 93077 Bad Abbach, Germany

<sup>3</sup>Current affiliation: Institute of Pharmaceutical Sciences, Humboldtstrasse 46, University of Graz, A-8010 Graz, Austria

<sup>4</sup>Omics Center Graz, BioTechMed-Graz, A-8010 Graz, Austria

<sup>5</sup>BioTechMed-Graz, A-8010 Graz, Austria

<sup>6</sup>Lehrstuhl Biochemie III, University Regensburg, Universitätsstr.31, 93053 Regensburg, Germany

\*Corresponding author; Institute of Molecular Biosciences, University of Graz, Humboldtstrasse 50/EG, A-8010 Graz, Austria. Tel.: +43316380-5629; Fax: +43316380-898; e-mail: [helmut.bergler@uni-graz.at](mailto:helmut.bergler@uni-graz.at).

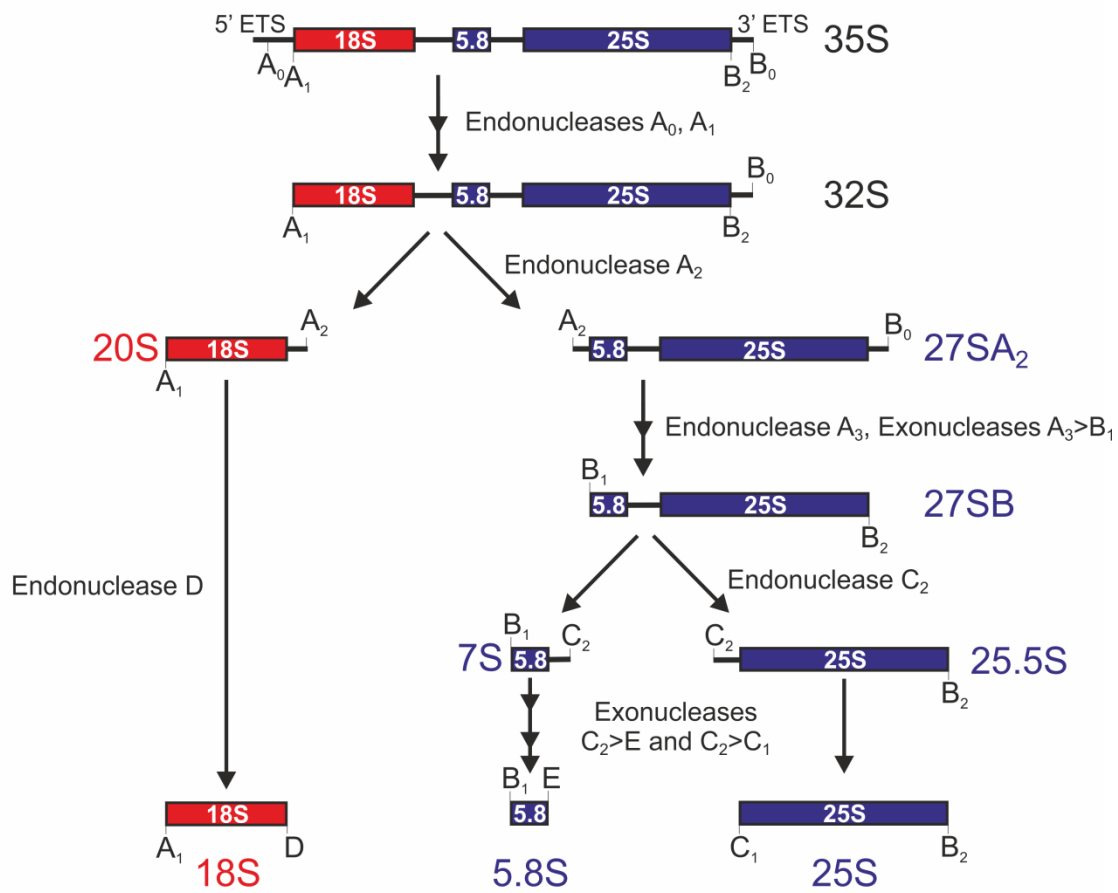

**Fig. S1: Processing scheme of pre-rRNA to the mature 25S, 5.8S and 18S rRNA.** Only the major steps are indicated. The 5S rRNA maturation occurs separately and is not shown.

**A**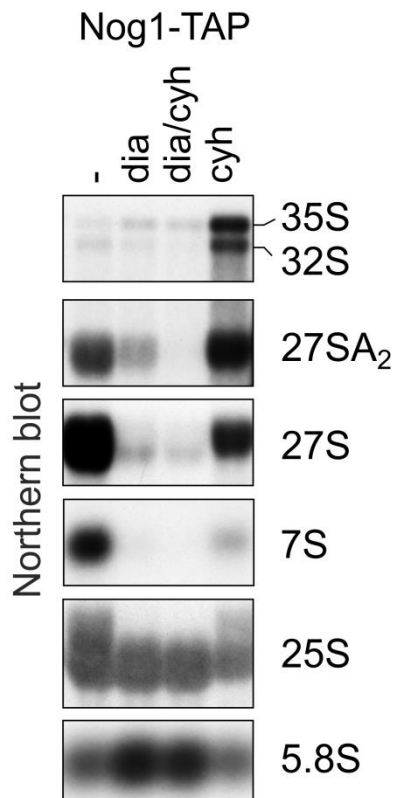**B**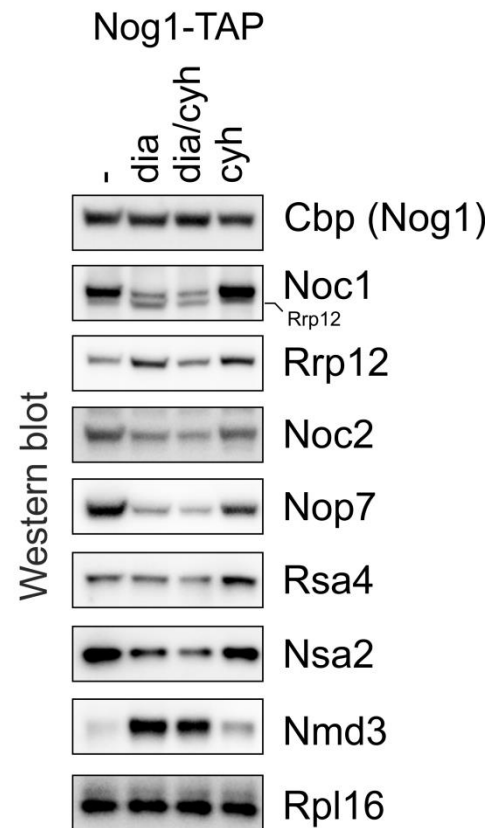

**Fig. S2: Incorporation of de novo synthesized Nog1-TAP is responsible for co-purification of 27SA<sub>2</sub> pre-rRNA and early pre-60S particles after longer diazaborine treatment.** Pre-60S particles were purified from cells treated with diazaborine (dia), diazaborine and cycloheximide (dia/cyh) or cycloheximide (cyh) alone for 30 minutes using Nog1-TAP as bait protein. Particles were analyzed for co-purified pre-rRNA and proteins using Northern blotting (**A**) and Western blotting (**B**), respectively.

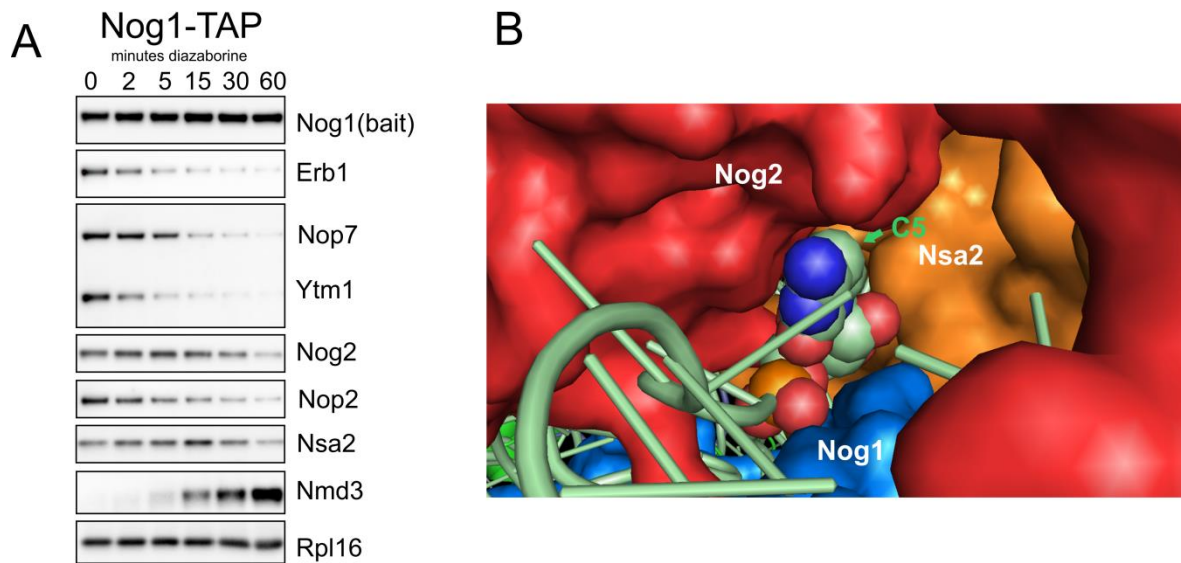

**Fig. S3: Analysis of selected proteins for their joining and leaving behavior on pre-60S particles.** (A) pre-60S particles were purified from cells after different time periods of treatment with diazaborine using Nog1-TAP as bait protein and analyzed by Western blotting for Ytm1/Erb1/Nop7 protein complex members and Nop2, Nog2 and Nsa2 proteins. Samples represent a different biological replicate as shown in Figure 2. To facilitate analysis of the Ytm1/Erb1/Nop7 complex, an antiserum simultaneously recognizing Ytm1 and Nop7 was used [1]. Western blots against the bait protein and the export factor Nmd3 are shown as controls. (B) Structural detail of the pre-60S particle around nucleotide C2870. Nucleotide C2870 methylated at C5 by the RNA:m5C-methyltransferase Nop2 is shown in the spheres mode and C5 highlighted by an arrowhead. Proteins associated with this region are Nog1 (blue), Nog2 (red) and Nsa2 (orange) and are shown as surface representation. 25S rRNA is shown in green. Based on data from [2].

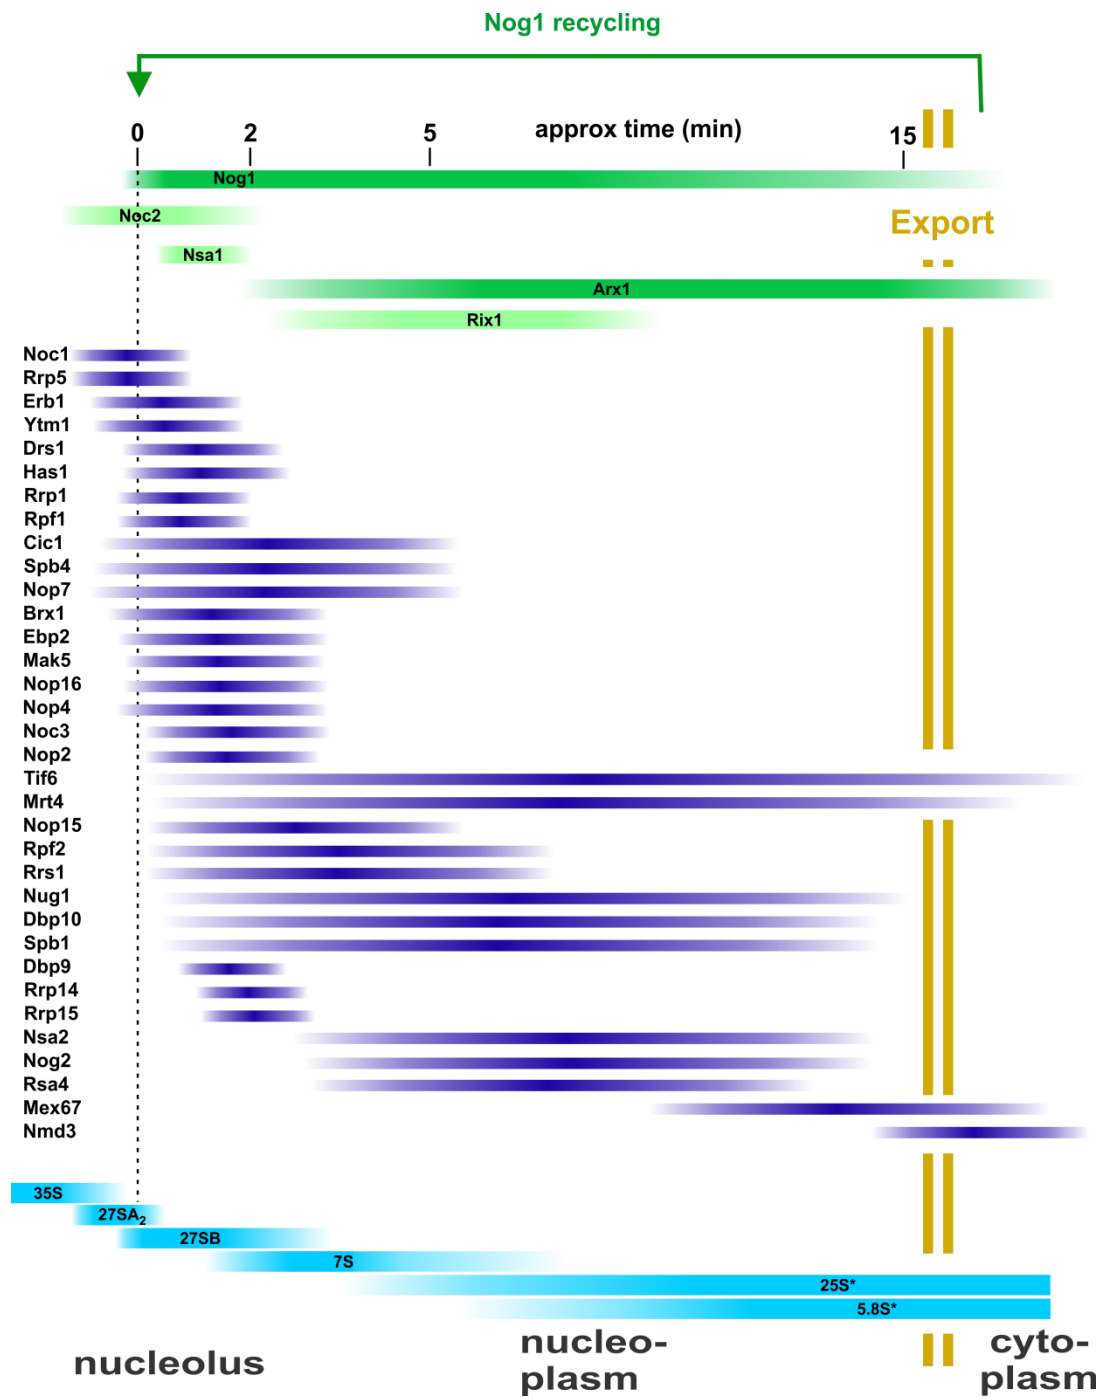

**Fig. S4: Scheme showing joining and release of individual pre-60S maturation factors.** Binding characteristics of bait proteins used in this study are symbolized by green bars. The approximate association period of selected maturation factors as inferred by western blotting and iTRAQ data is indicated by purple bars, while the co-purifying pre-rRNAs are symbolized by blue bars. The two brown vertical bars indicate the nuclear membrane.

**Supplemental Table 1: *Saccharomyces cerevisiae* strains used in this study**

| <i>S.cerevisiae</i> strain               | Genotype                                                                                                                                                                                        | Source     |
|------------------------------------------|-------------------------------------------------------------------------------------------------------------------------------------------------------------------------------------------------|------------|
| <b>Nog1-GFP</b><br><b>Hho1-mCherry</b>   | <i>MAT<math>\alpha</math> leu2 ura3 his3 met15 NOG1-</i><br><i>GFP::HIS3MX6 HHO1-mCherry::hphNT1</i>                                                                                            | this study |
| <b>Nog1-GFP</b><br><b>Nop58- mCherry</b> | <i>MAT<math>\alpha</math> his3<math>\Delta</math>1 leu2<math>\Delta</math>0 met15<math>\Delta</math>0 ura3<math>\Delta</math>0 NOG1-</i><br><i>GFP::HIS3MX6 NOP58-mCherry::hphNT1</i>           | this study |
| <b>Nog1-GFP</b><br><b>Nic96-mCherry</b>  | <i>MAT<math>\alpha</math> his3<math>\Delta</math>1 leu2<math>\Delta</math>0 met15<math>\Delta</math>0 ura3<math>\Delta</math>0 NOG1-</i><br><i>GFP::HIS3MX6</i><br><i>NIC96-mCherry::hphNT1</i> | this study |
| <b>Rix1-GFP</b><br><b>Nic96-mCherry</b>  | <i>MAT<math>\alpha</math> his3<math>\Delta</math>1 leu2<math>\Delta</math>0 met15<math>\Delta</math>0 ura3<math>\Delta</math>0 RIX1-</i><br><i>GFP::HIS3MX6</i><br><i>NIC96-mCherry::hphNT1</i> | this study |
| <b>Bud20-GFP</b><br><b>Nic96-mCherry</b> | <i>MAT<math>\alpha</math> his3<math>\Delta</math>1 leu2<math>\Delta</math>0 met15<math>\Delta</math>0 ura3<math>\Delta</math>0 BUD20-</i><br><i>GFP::HIS3MX6 NIC96-mCherry::hphNT1</i>          | this study |
| <b>Noc2-TAP</b>                          | <i>MAT<math>\alpha</math> his3 leu2 ura3 lys2 Noc2-TAP::URA3</i>                                                                                                                                | [3]        |
| <b>Nsa1-TAP</b>                          | <i>MAT<math>\alpha</math> his3 leu2 ura3 trp1 Nsa1-TAP::TRP</i>                                                                                                                                 | [4]        |
| <b>Rix1-TAP</b>                          | <i>MAT<math>\alpha</math> his3 leu2 ura3 trp1 Rix1-TAP::TRP</i>                                                                                                                                 | [5]        |
| <b>Arx1-TAP</b>                          | <i>MAT<math>\alpha</math> his3 leu2 ura3 trp1 Arx1-TAP::TRP</i>                                                                                                                                 | [6]        |
| <b>Nog1-TAP</b>                          | <i>MAT<math>\alpha</math> his3 leu2 ura3 trp1 ade2 Nog1-TAP::TRP</i>                                                                                                                            | [6]        |

**Supplemental Table 2: Oligonucleotides used for Northern blotting**

| <b>Oligo designation</b> | <b>Sequence</b>             | <b>Recognized pre-rRNAs</b> |
|--------------------------|-----------------------------|-----------------------------|
| Probe A2/A3              | 5'-TGTTACCTCTGGGCCC-3'      | 27SA <sub>2</sub> , 35S     |
| Probe E/C2               | 5'-GGCCAGCAATTTCAAGTTA-3'   | 27S, 7S, 35S                |
| Probe 5.8S               | 5'-GCGTTCTTCATCGATGC-3'     | 5,8S, 7S, 27S, 35S          |
| Probe 25S                | 5'-CTCCGCTTATTGATATGC-3'    | 25S, 27S, 35S               |
| Probe 18S                | 5'-GCATGGCTTAATCTTTGAGAC-3' | 18S, 20S, 35S               |
| Probe 5S                 | 5'-GGTCACCCACTACTACTCGG-3'  | 5S                          |

**Supplemental Table 3: Proteomic analysis of Nog1-TAP after 15 minutes of diazaborine treatment**

| function/localization | protein <sup>§</sup> | Replicate 1 |             | Replicate 2 |             | mean        | sd*         | %sd*        |
|-----------------------|----------------------|-------------|-------------|-------------|-------------|-------------|-------------|-------------|
|                       |                      | labeling 1  | labeling 2  | labeling 1  | labeling 2  |             |             |             |
| shuttling             | Tif6                 | 1,35        | 1,49        | 0,85        | 0,81        | 1,12        | 0,30        | 26,39       |
| <b>shuttling</b>      | <b>Nog1</b>          | <b>1,00</b> | <b>1,00</b> | <b>1,00</b> | <b>1,00</b> | <b>1,00</b> | <b>0,00</b> | <b>0,00</b> |
|                       | Rrp12                |             | 0,76        | 1,03        | 0,92        | 0,90        | 0,11        | 12,51       |
| shuttling             | Arx1                 | 0,83        | 1,00        | 0,82        | 0,83        | 0,87        | 0,07        | 8,49        |
|                       | Mak5                 | 0,85        | 0,88        | 0,86        | 0,87        | 0,86        | 0,01        | 0,99        |
|                       | Nop13                | 0,91        | 0,90        | 0,87        | 0,74        | 0,86        | 0,07        | 7,75        |
| late nucleoplasmic    | Nog2                 | 0,79        | 1,06        | 0,75        | 0,79        | 0,85        | 0,12        | 14,48       |
| shuttling             | Rlp24                | 1,10        |             | 0,72        | 0,70        | 0,84        | 0,18        | 21,81       |
| shuttling             | Mrt4                 | 1,00        | 1,01        | 0,66        | 0,68        | 0,84        | 0,17        | 19,76       |
|                       | Nop12                | 0,88        | 1,06        | 0,55        |             | 0,83        | 0,21        | 25,48       |
| late nucleoplasmic    | Rsa4                 | 0,88        | 1,04        | 0,65        | 0,52        | 0,77        | 0,20        | 26,24       |
|                       | Jip5                 | 0,58        | 0,59        | 0,90        | 0,82        | 0,72        | 0,14        | 19,67       |
|                       | Puf6                 | 0,81        | 0,75        | 0,65        | 0,65        | 0,72        | 0,07        | 9,46        |
|                       | Pwp1                 | 0,81        | 0,80        | 0,62        | 0,61        | 0,71        | 0,09        | 13,23       |
|                       | Ssf1                 | 0,59        | 0,48        | 0,83        | 0,66        | 0,64        | 0,13        | 19,75       |
|                       | Nsr1                 | 0,88        |             | 0,54        | 0,49        | 0,64        | 0,17        | 27,05       |
| late nucleoplasmic    | Rix1                 | 0,34        | 0,81        | 0,57        | 0,76        | 0,62        | 0,18        | 29,62       |
| 5S binding            | Rpf2                 | 0,51        | 0,56        | 0,66        | 0,63        | 0,59        | 0,06        | 10,07       |
| 5S binding            | Rrs1                 | 0,63        | 0,61        | 0,50        | 0,53        | 0,57        | 0,05        | 9,38        |
| late nucleoplasmic    | Nug1                 | 0,57        | 0,65        | 0,47        | 0,54        | 0,56        | 0,06        | 11,41       |
| late nucleoplasmic    | Rea1                 | 0,52        | 0,75        | 0,53        | 0,42        | 0,56        | 0,12        | 21,84       |
|                       | Noc2                 | 0,66        |             | 0,44        | 0,46        | 0,52        | 0,10        | 19,12       |
|                       | Brx1                 | 0,58        | 0,59        | 0,46        | 0,43        | 0,52        | 0,07        | 13,44       |
|                       | Nip7                 | 0,58        | 0,65        | 0,36        | 0,34        | 0,48        | 0,13        | 27,78       |
|                       | Rrp15                | 0,55        |             | 0,37        | 0,51        | 0,47        | 0,08        | 16,48       |
|                       | Drs1                 | 0,40        | 0,51        | 0,45        | 0,54        | 0,47        | 0,06        | 11,70       |
|                       | Rrp5                 | 0,47        |             | 0,49        | 0,45        | 0,47        | 0,02        | 3,39        |
|                       | Nop4                 | 0,53        |             | 0,40        | 0,45        | 0,46        | 0,05        | 11,54       |
|                       | Has1                 | 0,35        | 0,53        | 0,43        | 0,48        | 0,45        | 0,07        | 14,76       |
|                       | Nop2                 | 0,54        | 0,50        | 0,42        | 0,32        | 0,44        | 0,08        | 18,78       |
|                       | Fpr3                 | 0,58        | 0,56        | 0,29        | 0,34        | 0,44        | 0,13        | 29,50       |
|                       | Spb4                 | 0,45        | 0,43        | 0,34        | 0,46        | 0,42        | 0,05        | 11,25       |
| ITS2 binding          | Nop53                | 0,35        | 0,36        | 0,47        | 0,47        | 0,41        | 0,06        | 14,65       |
|                       | Rpf1                 | 0,47        |             | 0,31        | 0,38        | 0,38        | 0,07        | 17,01       |
| Nop7 loading          | Ytm1                 | 0,40        | 0,40        | 0,33        | 0,40        | 0,38        | 0,03        | 8,41        |
| ITS2 binding          | Nsa3                 | 0,35        | 0,41        | 0,34        | 0,41        | 0,38        | 0,03        | 8,71        |
| ITS2 binding          | Nop7                 | 0,37        | 0,52        | 0,34        | 0,26        | 0,37        | 0,09        | 24,77       |
|                       | Rrp1                 | 0,48        | 0,44        | 0,30        | 0,26        | 0,37        | 0,09        | 25,03       |
|                       | Ebp2                 | 0,42        | 0,42        | 0,29        | 0,31        | 0,36        | 0,06        | 16,82       |
| ITS2 binding          | Rlp7                 | 0,40        | 0,39        | 0,33        | 0,28        | 0,35        | 0,05        | 14,24       |
| Nop7 loading          | Erb1                 | 0,39        | 0,47        | 0,26        | 0,25        | 0,34        | 0,09        | 27,00       |
| ITS2 binding          | Nop15                | 0,31        | 0,37        | 0,34        | 0,30        | 0,33        | 0,02        | 7,51        |
|                       | Nop16                | 0,40        | 0,32        | 0,25        | 0,26        | 0,31        | 0,06        | 20,50       |
|                       | Nsa1                 | 0,36        | 0,29        | 0,24        | 0,27        | 0,29        | 0,04        | 15,38       |

sd\*: standard deviation

§ only factors identified in at least 3 independent labeling experiments and exhibiting less than 30% standard deviation were considered



## SUPPLEMENTAL REFERENCES

1. Wegrecki M, Rodríguez-Galán O, de la Cruz J, Bravo J. The structure of Erb1-Ytm1 complex reveals the functional importance of a high-affinity binding between two  $\beta$ -propellers during the assembly of large ribosomal subunits in eukaryotes. *Nucleic Acids Res* 2015;**43**:11017–30.
2. Wu S, Tutuncuoglu B, Yan K, Brown H, Zhang Y, Tan D, Gamalinda M, Yuan Y, Li Z, Jakovljevic J *et al.* Diverse roles of assembly factors revealed by structures of late nuclear pre-60S ribosomes. *Nature* 2016;**534**:133–7.
3. Hierlmeier T, Merl J, Sauert M, Perez-Fernandez J, Schultz P, Bruckmann A, Hamperl S, Ohmayer U, Rachel R, Jacob A *et al.* Rrp5p, Noc1p and Noc2p form a protein module which is part of early large ribosomal subunit precursors in *S. cerevisiae*. *Nucleic Acids Res* 2013;**41**:1191–210.
4. Kressler D, Roser D, Pertschy B, Hurt E. The AAA ATPase Rix7 powers progression of ribosome biogenesis by stripping Nsa1 from pre-60S particles. *J Cell Biol* 2008;**181**:935–44.
5. Nissan TA, Galani K, Maco B, Tollervey D, Aebi U, Hurt E. A pre-ribosome with a tadpole-like structure functions in ATP-dependent maturation of 60S subunits. *Mol Cell* 2004;**15**:295–301.
6. Kappel L, Loibl M, Zisser G, Klein I, Fruhmann G, Gruber C, Unterweger S, Rechberger G, Pertschy B, Bergler H. Rlp24 activates the AAA-ATPase Drg1 to initiate cytoplasmic pre-60S maturation. *J Cell Biol* 2012;**199**:771–82.
